# Supplementary material for: The energy-down-shift effect of Cd0.5Zn0.5S–ZnS core–shell quantum dots on power-conversion-efficiency enhancement in silicon solar cells
Source: Royal Society of Chemistry journal article supplement (doi:10.1039/c4cp00794h), 2014-06-30
Supplement: c4cp00794h1.pdf [file c4cp00794h1.pdf]

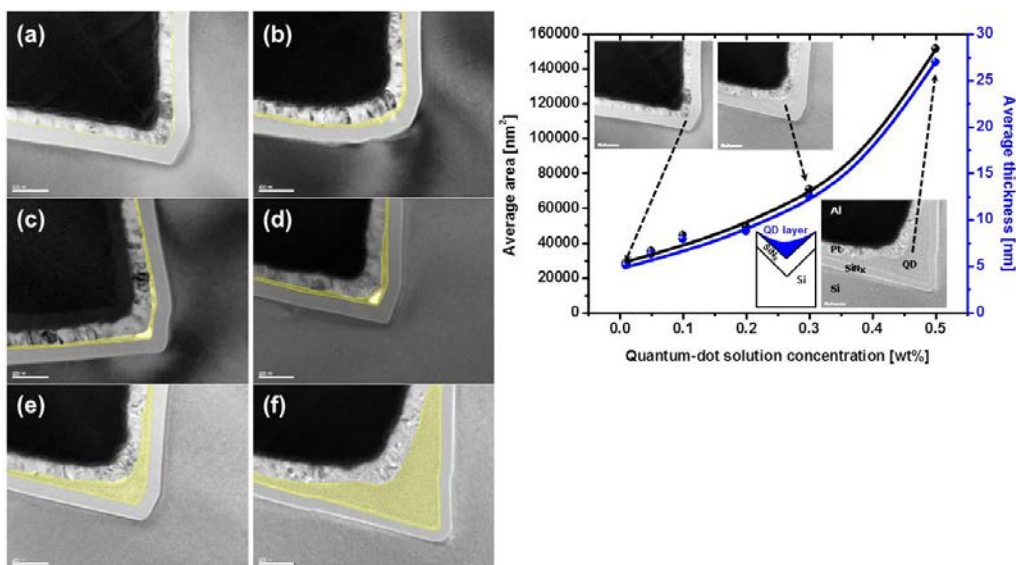

**Supplementary Figure 1.** Surface morphology of Cd<sub>0.5</sub>Zn<sub>0.5</sub>S/ZnS core/shell QDs layer on SiN<sub>x</sub> film textured pyramids for p-type solar-cells: (a) – (e) TEM images and (g) average area and thickness of Cd<sub>0.5</sub>Zn<sub>0.5</sub>S/ZnS core/shell QDs layer, varying with concentration of QD solution.

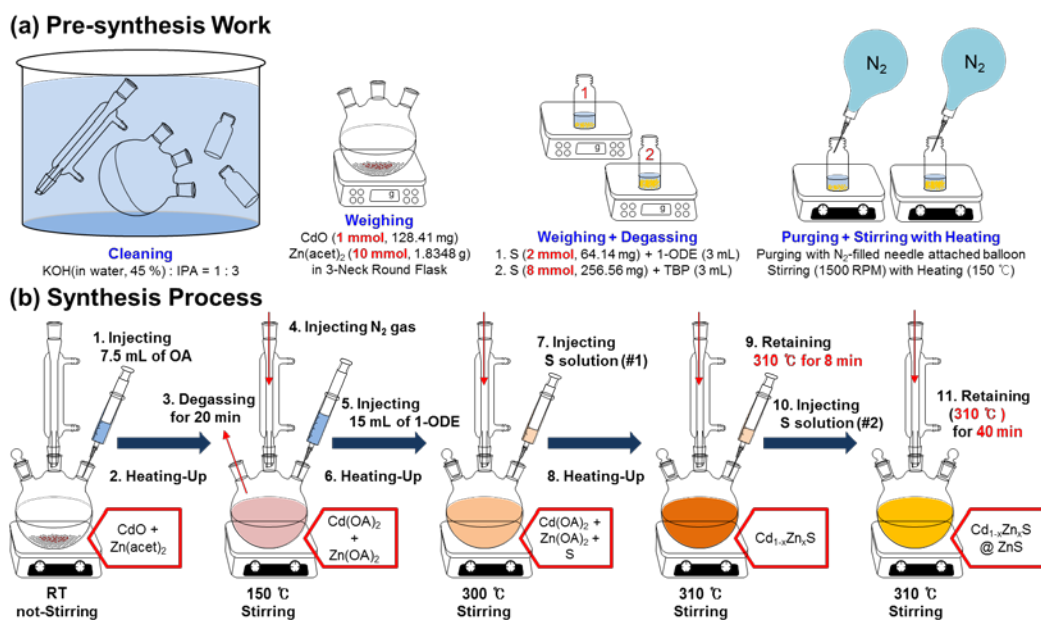

**Supplementary Figure 2.** Synthesis flow of Cd<sub>0.5</sub>Zn<sub>0.5</sub>S/ZnS core/shell QDs. (a) pre-synthesis and (b) synthesis process.

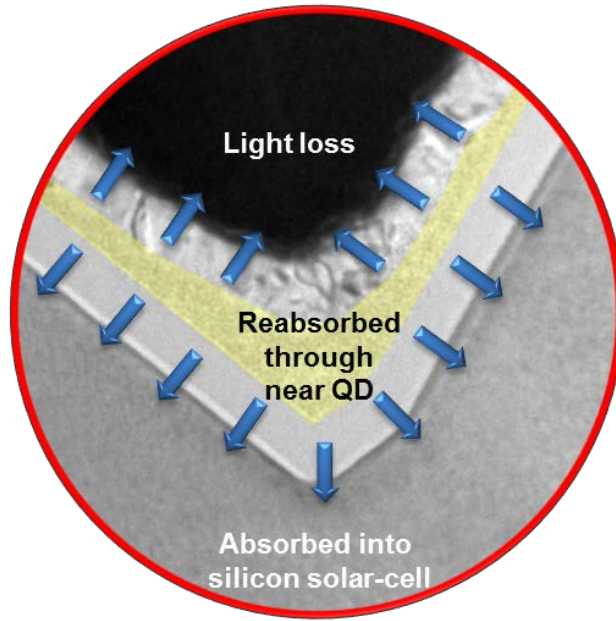

**Supplementary Figure 3.** The QD layer on the SiN<sub>x</sub> film textured silicon solar-cells isotropically emitted the blue light.

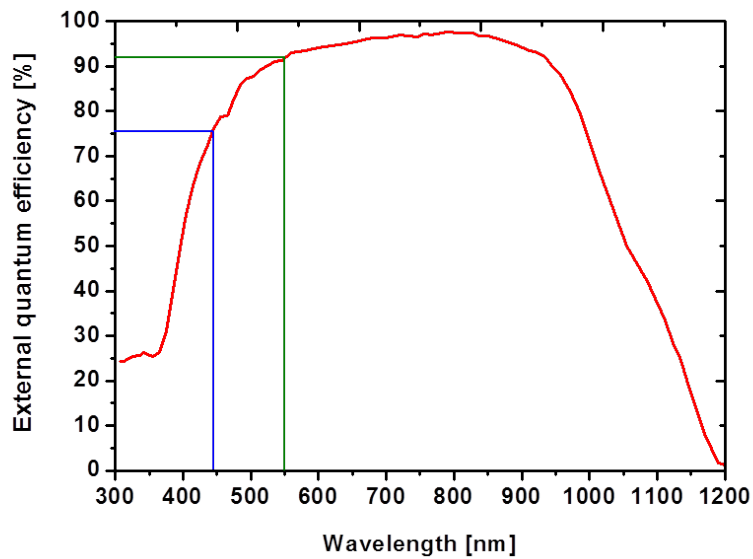

**Supplementary Figure 4.** EQE simulation as function of wavelength for p-type silicon solar-cell.

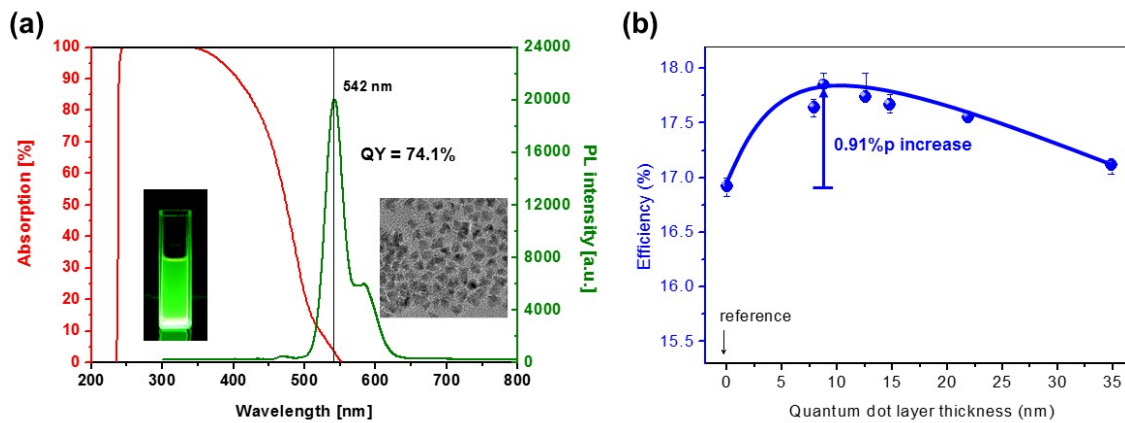

**Supplementary Figure 5.** Optical characteristics and photo-voltaic performance for CdSe/ZnS core/shell QDs. (a) absorption, luminescence, and emitting light photography and (b) PCE depending on CdSe/ZnS core/shell QDs layer thickness.
